# Supplementary material for: Single-Cell Analysis Reveals Distinct Gene Expression and Heterogeneity in Male and Female Plasmodium falciparum Gametocytes
Source: PubMed Central journal article supplement (PMC5909122; doi:10.1128/msphere.00130-18), 2018-04-11

A. Present in 50%  
Mean-centered, at least one observation > 1  
Average Linkage

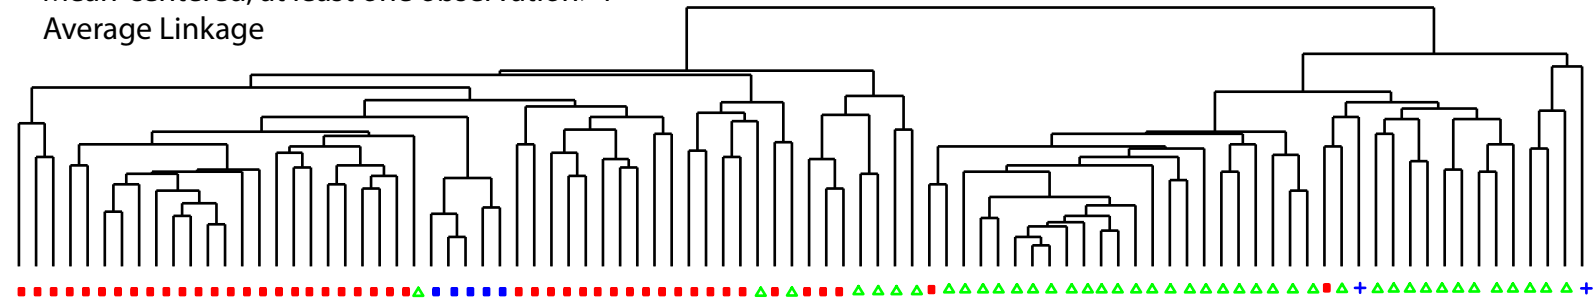

B. Present in 50%  
Mean-centered, at least one observation > 1  
Centroid Linkage

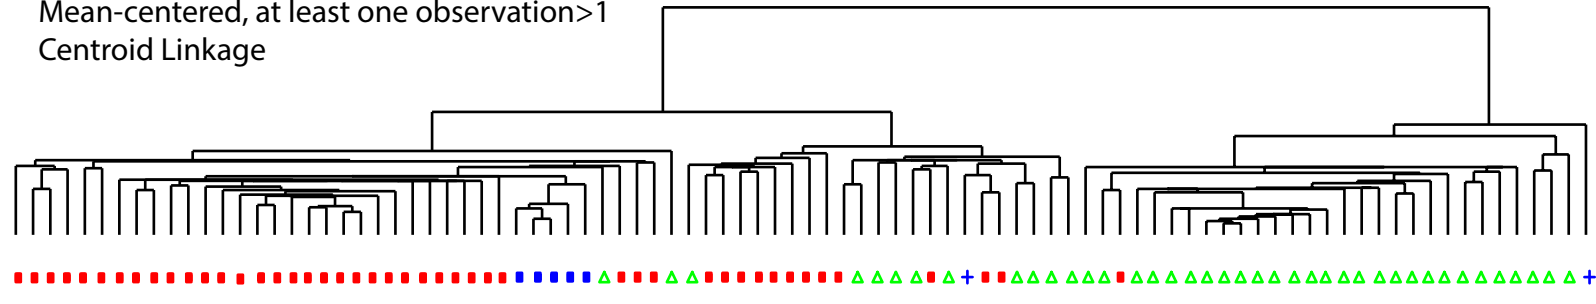

C. Present in 70%  
Mean-centered, at least one observation > 1  
Complete Linkage

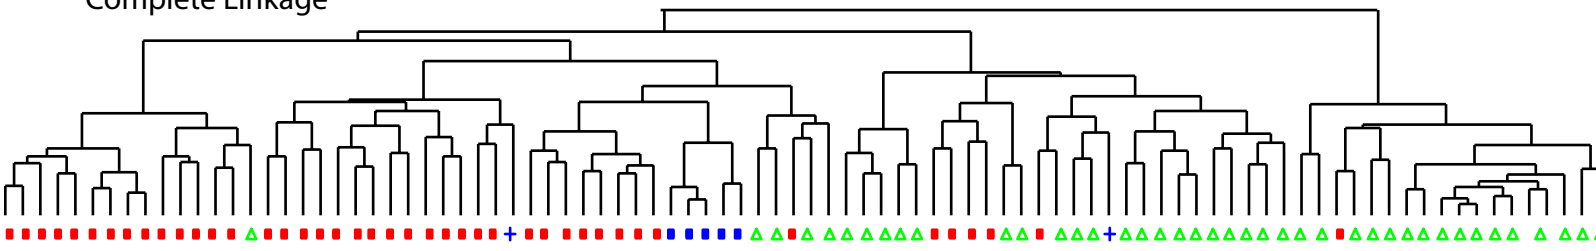

D. Present in 60%  
Mean-centered, at least one observation > 1  
Average Linkage

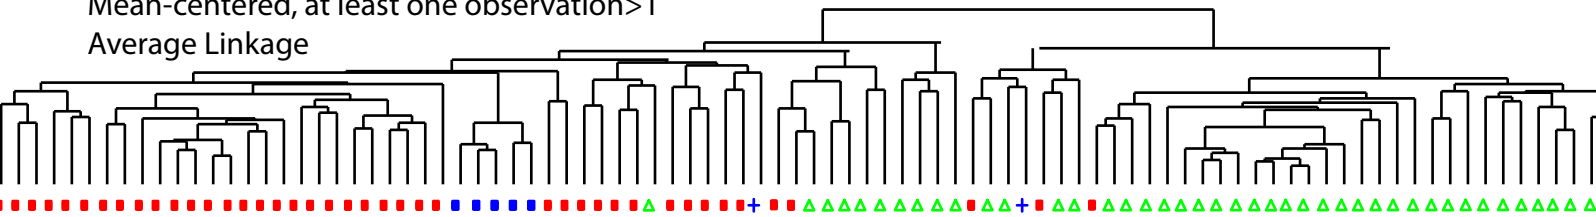

Supplement: sph002182509sf1.pdf [file sph002182509sf1.pdf]
