# Supplementary material for: Single-Cell Analysis Reveals Distinct Gene Expression and Heterogeneity in Male and Female Plasmodium falciparum Gametocytes
Source: PubMed Central journal article supplement (PMC5909122; doi:10.1128/msphere.00130-18), 2018-04-11

# Transcript levels of genes from purified male and female gametocytes

## Female-Enriched Genes

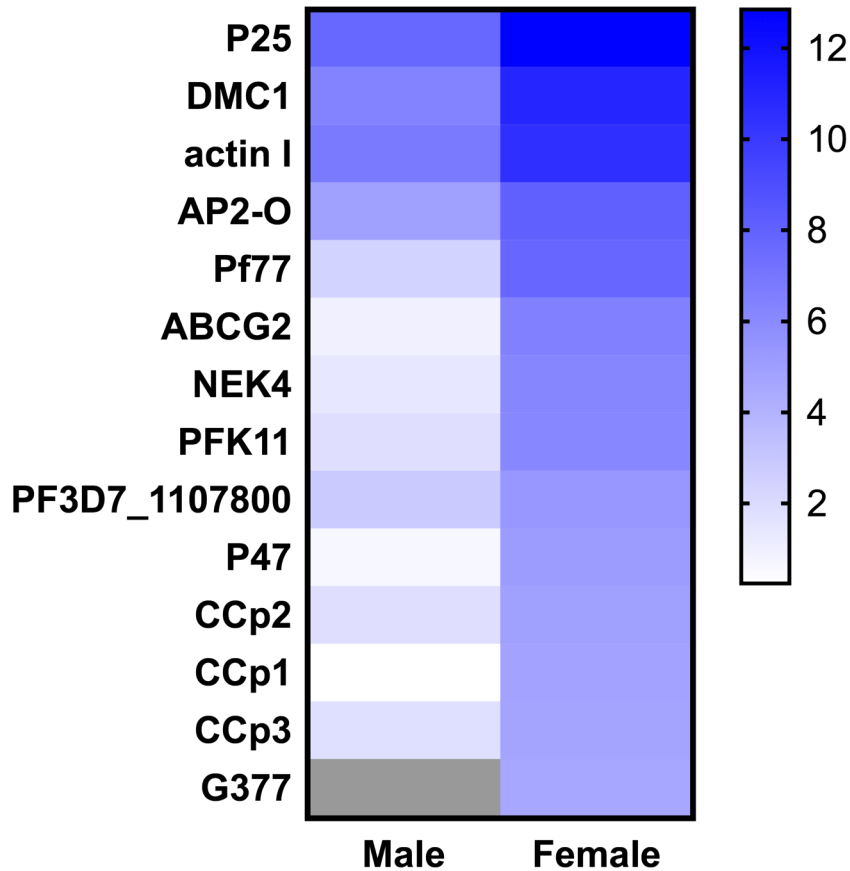

## Male-Enriched Genes

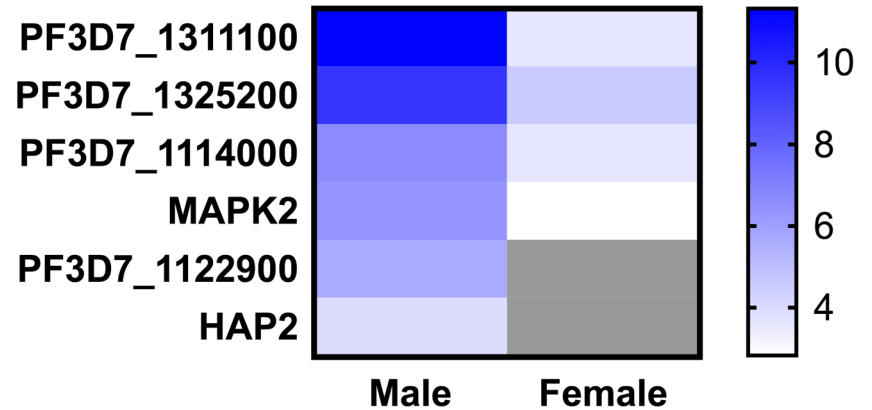

Supplement: sph002182509sf3.pdf [file sph002182509sf3.pdf]
