# Supplementary material for: Single-Cell Analysis Reveals Distinct Gene Expression and Heterogeneity in Male and Female Plasmodium falciparum Gametocytes
Source: PubMed Central journal article supplement (PMC5909122; doi:10.1128/msphere.00130-18), 2018-04-11
Supplement: sph002182509sf4.pdf [file sph002182509sf4.pdf]

**A**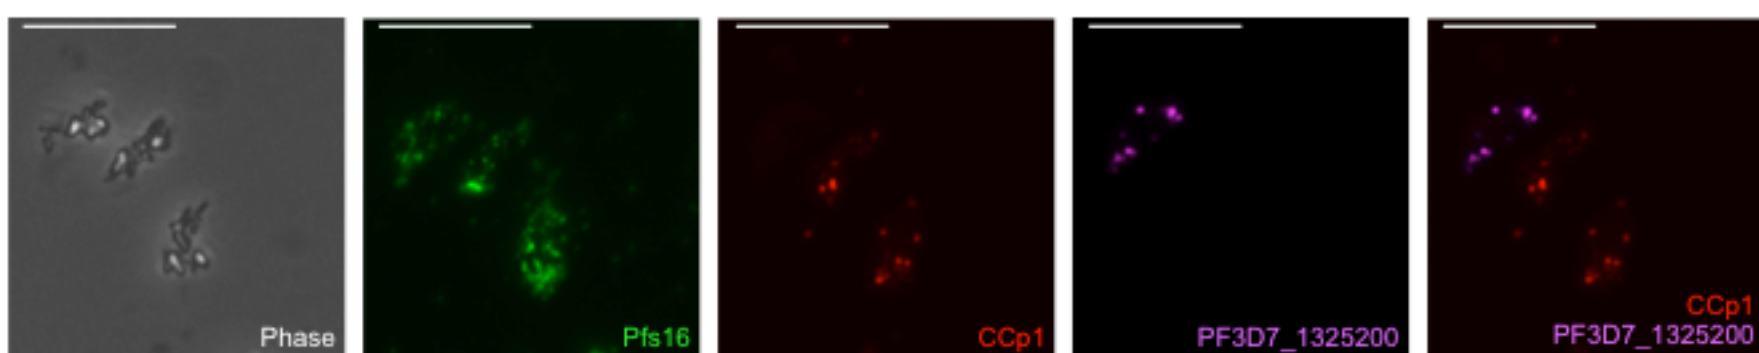**B**

CCp1 vs. PF3D7\_1325200

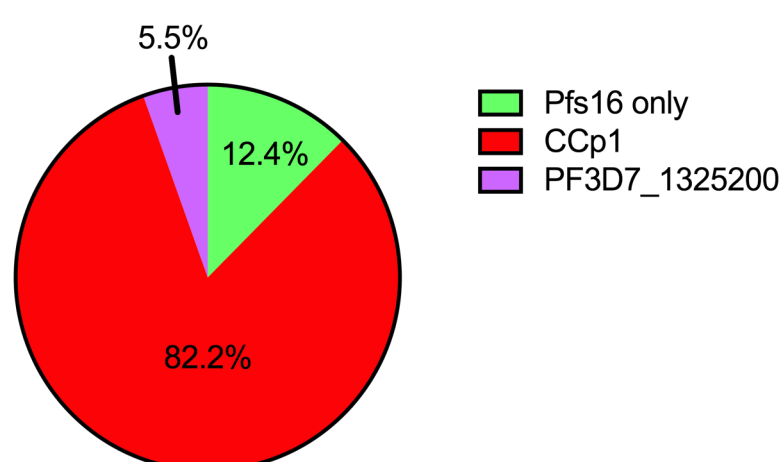

Total = 605 gametocytes

**C**

PF3D7\_1325200

|        | +  | -   |
|--------|----|-----|
| CCp1 + | 0  | 497 |
| CCp1 - | 33 | 75  |

**D**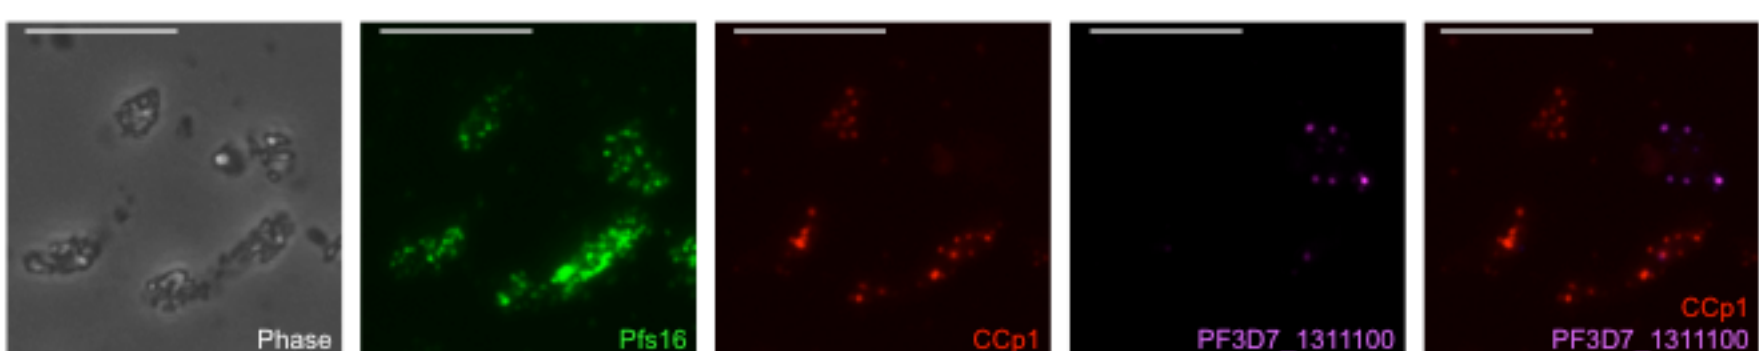**E**

CCp1 vs. PF3D7\_1311100

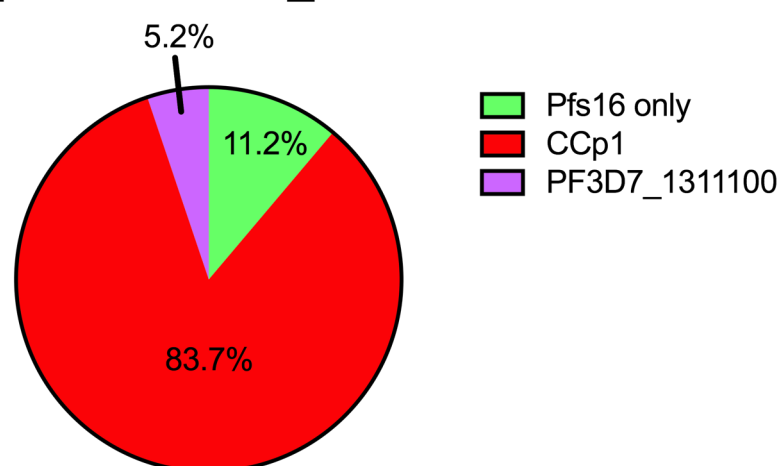

Total = 619 gametocytes

**F**

PF3D7\_1311100

|        | +  | -   |
|--------|----|-----|
| CCp1 + | 0  | 518 |
| CCp1 - | 32 | 69  |

**G**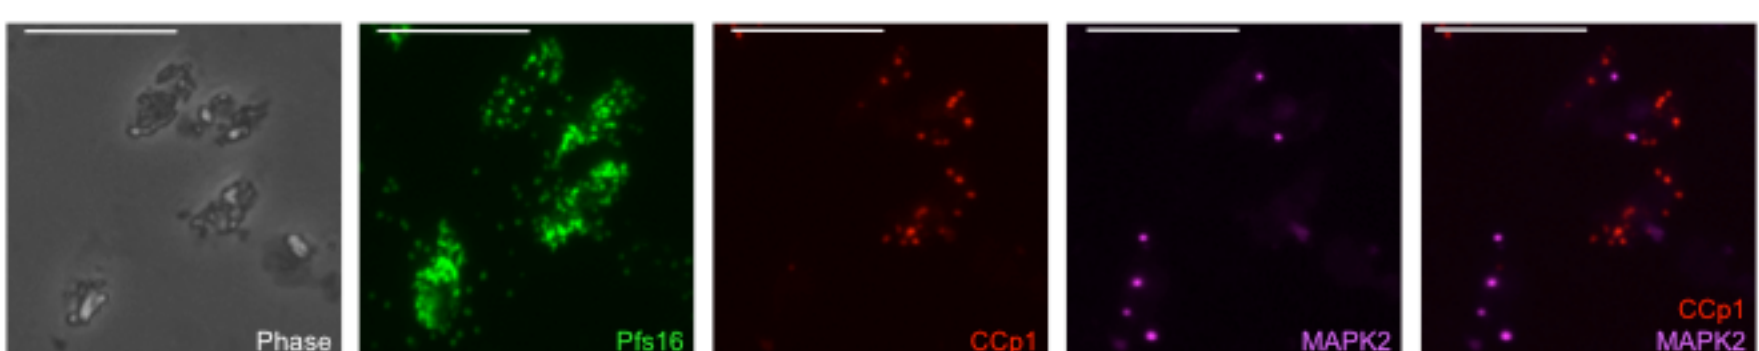**H**

CCp1 vs. MAPK2

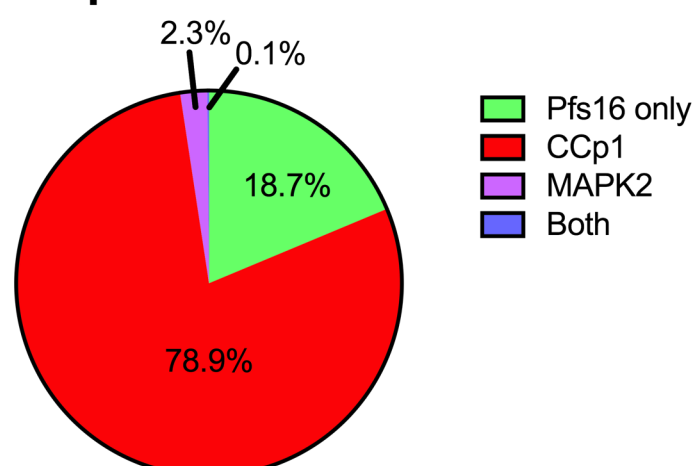

Total = 706 gametocytes

**I**

MAPK2

|        | +  | -   |
|--------|----|-----|
| CCp1 + | 1  | 557 |
| CCp1 - | 16 | 132 |
