# Supplementary material for: Single-Cell Analysis Reveals Distinct Gene Expression and Heterogeneity in Male and Female Plasmodium falciparum Gametocytes
Source: PubMed Central journal article supplement (PMC5909122; doi:10.1128/msphere.00130-18), 2018-04-11
Supplement: sph002182509st1.pdf [file sph002182509st1.pdf]

| Supplementary Table 1: Primers used in Biomark single-cell qPCR |                                |                                                       |                             |                             |
|-----------------------------------------------------------------|--------------------------------|-------------------------------------------------------|-----------------------------|-----------------------------|
| Gene ID                                                         | Old Gene ID                    | Gene Description                                      | Forward Primer              | Reverse Primer              |
| PF3D7_1246200                                                   | PFL2215w                       | actin I                                               | AGAGCTGCTCCAGAAGAACA        | GTGTCATCCTCTCACGATTTC       |
| PF3D7_1475500                                                   | PF14_0723                      | CCp1, LCCL domain-containing protein                  | CCAAAATGTTCCCCAGAACC        | AGGCGGATTTCCATTCCAA         |
| PF3D7_1455800                                                   | PF14_0532                      | CCp2, LCCL domain-containing protein                  | AGCTATGATGGTAACGAACCA       | TCATGAATAGCATGTCTCATATTAACC |
| PF3D7_0621100                                                   | MAL6P1.216, PFF1020C           | conserved <i>Plasmodium</i> protein, unknown function | GACCATATCCAATTGGTCCATTCA    | TCCAGTGGCTATTCTACCTGAC      |
| PF3D7_0618500                                                   | MAL6P1.242, PFF0895W           | MDH, malate dehydrogenase                             | TCGGAGCAATTGTTGGAGAA        | TGGTATACCTGGGACTACATCA      |
| PF3D7_0622800                                                   | MAL6P1.201, PFF1095W           | leucine--tRNA ligase, putative                        | GGACCAGAATTGCCTTAGCA        | AATAGCACTATTTGCCGTATCAGTA   |
| PF3D7_0621400                                                   | MAL6P1.213, PFF1035W           | Pf77                                                  | GATGTACCTGTATGTAAATATGTTCCC | TGTACAGCGGGATATGGAAC        |
| PF3D7_0104400                                                   | MAL1P1.35, PFA0225w            | 4-hydroxy-3-methylbut-2-enyl diphosphate reductase    | CGAAAATGCTAGAGATCCAAACA     | CCGTTTCTATAGCCCCGACTAA      |
| PF3D7_0111400                                                   | MAL1P2.39, PFA0550w            | GEXP19                                                | ATTTCTTGTATCAATGGAGAGAAACA  | CAATTGCAAATGCTTGGTCATA      |
| PF3D7_0513700                                                   | MAL5P1.137, PFE0680W, PFE0685w | PSOP12, secreted ookinete protein, putative           | GTCGTGCTAGTAAGGATTCTGGTA    | GCTTTTGGCGTGTGGGTAATA       |
| PF3D7_1407000                                                   | PF14_0067                      | CCp3, LCCL domain-containing protein                  | GAAATTGCCCTCATGAAACACA      | TCACCTCCAACACATCCAAC        |
| PF3D7_0816800                                                   | MAL8P1.76                      | DMC1, meiotic recombination protein<br>DMC1, putative | AGAGGATGAAGGGATAAAGGAAC     | TGTCTGCAGCGTTTATACCTA       |
| PF3D7_1325200                                                   | PF13_0144                      | lactate dehydrogenase, putative                       | AATGGCGGGTGTTCCTTCATA       | TCTCCATGAGCTCCTATCACA       |

|               |                       |                                                                       |                           |                           |
|---------------|-----------------------|-----------------------------------------------------------------------|---------------------------|---------------------------|
| PF3D7_1113900 | PF11_0147             | MAPK2, mitogen-activated protein kinase 2                             | GGTATAGGGCACCAGAGCTTA     | GCAAATATACAACCAGTCGACCATA |
| PF3D7_1216500 | MAL12P1.159, PFL0795c | MDV1, male development gene 1                                         | GAGTGTCTTCAACATCTCCAAC    | AATCACCTGCTTTTGCTCCTA     |
| PF3D7_1228300 | MAL12P1.274, PFL1370w | NEK1, NIMA related kinase 1                                           | TACCTATATGGCGATGCAGAAA    | GCGCCTGTTATATTCGCTAC      |
| PF3D7_0823500 | PF08_0033             | IMC1i, inner membrane complex protein 1i, putative                    | GCACGTTTCGGTTACAGGAA      | GTTGCAGGTCGTACTGATACAA    |
| PF3D7_1025000 | PF10_0244             | formin 2, putative                                                    | TGCTCATGCTCAGAATGGTAAC    | ACAATATCGAAGCTGGGTAAACAA  |
| PF3D7_1030900 | PF10_0302             | P28, 28 kDa ookinete surface protein                                  | CTTCATCTAACGGAGGAGGAAA    | ACGTGTGTTAGGGTTACTCC      |
| PF3D7_1031000 | PF10_0303             | P25, 25 kDa ookinete surface antigen precursor                        | CTGAAATGTGACGAAAAGACTGTA  | GCGTATGAAACGGGATTTC       |
| PF3D7_1031600 | PF10_0310             | GEXP15, conserved <i>Plasmodium</i> protein, unknown function         | ACAAAACGCGAATTCGAAGCA     | CCATTTAGTTGCCAATGTATGTCTA |
| PF3D7_1102500 | PF11_0037             | GEXP02, <i>Plasmodium</i> exported protein (PHISTb), unknown function | ACATGGAGGTGAATCAAAGGTA    | TGCTTCTACTCATACCAGAATCC   |
| PF3D7_1122900 | PF11_0240             | dynein heavy chain, putative                                          | GTGACTTCAGACAGGGGAAA      | GTGCAACACCAGCTAATATCC     |
| PF3D7_1128300 | PF11_0294             | PFK11, ATP-dependent 6-phosphofructokinase                            | TTACTGGAGGAAATATGTTCCCAAC | GTGAGAAGTAGTTCGGTACTTAACC |
| PF3D7_1129900 | PF11_0310             | MFR5, major facilitator superfamily-related transporter, putative     | CAAACCTGGGCTCAGTGGATA     | GTCCATTTGCACATGCTGAA      |
| PF3D7_1311100 | PF13_0060             | meiosis-specific nuclear structural protein 1, putative               | ACGAATATGCTCGAGAACGAA     | TCATCTGACACGTTCTGTATCC    |

|               |                      |                                                               |                             |                           |
|---------------|----------------------|---------------------------------------------------------------|-----------------------------|---------------------------|
| PF3D7_1339900 | PF13_0218            | ABCB5, ABC transporter B family member 5, putative            | TACACAACATATAACACATGGTCAAC  | CCCCTACACCTAGTCCTAACA     |
| PF3D7_1407800 | PF14_0075            | plasmepsin IV                                                 | GTGGTTCCGAATTTGATGGTATCC    | TCAACAACAACCGGATCAATAGAAC |
| PF3D7_1429600 | PF14_0275            | GEXP03, conserved <i>Plasmodium</i> protein, unknown function | CGGCATCAGAAGAGTGTGTT        | TGTCTTATGCAAGACTTTGTAAGGT |
| PF3D7_1430800 | PF14_0287            | conserved <i>Plasmodium</i> protein, unknown function         | TTGAAGTACCAATACCTGCACAA     | GCTTGGATGCGTTTGATATTCC    |
| PF3D7_1431100 | PF14_0290            | conserved <i>Plasmodium</i> protein, unknown function         | AGTACCAGTCAATGTGTATGTACC    | CTGGTCCCCTTTTGCCTTA       |
| PF3D7_1437200 | PF14_0352            | ribonucleoside-diphosphate reductase large subunit, putative  | TGCAGACAGGGGTATTTTCA        | GTAAGCTCCCGTTTTCAATCC     |
| PF3D7_1458000 | PF14_0553            | FP1, cysteine proteinase falcipain 1                          | GAAAAGGGTATAGTACATGAGCCAAAA | CAACACTTGCAAAAGCCCAAC     |
| PF3D7_1461800 | PF14_0588            | conserved <i>Plasmodium</i> protein, unknown function         | GATGCTGAAGACGATGTTGAC       | ACGTTTCATATCTACATGGGGATTA |
| PF3D7_1474900 | PF14_0717            | CITH, trailer hitch homolog, putative                         | TTGCGCCATCTAATGAAGTG        | GCTGGATCGTCTGGGATATT      |
| PF3D7_0315600 | MAL3P5.20, PFC0680w  | zinc finger protein, putative                                 | CATGCCCTCTTTTGGA ACTCAA     | TGACATCCACGAGTCCATTCA     |
| PF3D7_0320800 | MAL3P7.12, PFC0915w  | DOZI, ATP-dependent RNA helicase DDX6                         | AACAGCAGCTTTTGCTATACCC      | TTCTCGCGTGGGTACCAAA       |
| PF3D7_0717500 | PF07_0072            | CDPK4, calcium-dependent protein kinase 4                     | AGATGGGTCAGGTAAAATATCAGCAA  | CCAACATTCTGAGCTGACATCAC   |
| PF3D7_0517400 | MAL5P1.174, PFE0870w | FACT-L, FACT complex subunit SPT16, putative                  | GACGAGTATGAGGTGGACGAA       | TGCCAAGCTTTTCGTCTTCAC     |
| PF3D7_1302100 | PF13_0011            | G27/25, gamete antigen 27/25                                  | AGGACGCAGCAGCAAGAATA        | GGTGTTACGGGTAAAGCAGGTA    |

|               |                       |                                                                          |                             |                              |
|---------------|-----------------------|--------------------------------------------------------------------------|-----------------------------|------------------------------|
| PF3D7_0904800 | PFI0235w              | RPA1, replication protein A1, small fragment                             | GGTCGAGTGTCTATAGCAAATCC     | CCATCATCTTTCAC TTCATGTATTTAC |
| PF3D7_1205600 | MAL12P1.56, PFL0280c  | conserved <i>Plasmodium</i> protein, unknown function                    | GATTCGGATGTGGACGAACA        | CGTTCAGCTGCTACGCATA          |
| PF3D7_1250100 | MAL12P1.479, PFL2405c | G377, osmiophilic body protein G377                                      | ACGACCACACGAACCAGAAA        | TTCCGGTTCAGGTTCTCTGAC        |
| PF3D7_1431500 | PF14_0294             | MAPK1, mitogen-activated protein kinase 1                                | TCGATGGTATAGAGCTCCTGAA      | CTCCCATGATACAACCTAAGGAC      |
| PF3D7_1346700 | PF13_0247             | P48/45, 6-cysteine protein                                               | AGTGCACATATTTTCATGTAACGTAC  | CACCAGGACAATTTAAACCTACC      |
| PF3D7_1113100 | PF11_0139             | PRL, protein tyrosine phosphatase                                        | GCGGTAGCAGTTCATTGTGTA       | GGCATCAATAGGGTCCATTCC        |
| PF3D7_0209000 | PF02_0086, PFB0405w   | P230, 6-cysteine protein                                                 | CCAGCAGATACAGATGCTAACC      | GGTTGAAAAGGTCCAGATTCA        |
| PF3D7_0208900 | PF02_0085, PFB0400w   | P230p, 6-cysteine protein                                                | GTTGTGATTTTATAGACACACCATCA  | GTGAGGATGCATGTGATCCA         |
| PF3D7_1215000 | PFL0725w, MAL12P1.145 | Trx-Px2, thioredoxin peroxidase 2                                        | TGACCTTTCCTCTTTTATAGGTCAGAA | TTCTGTTGGACATACGAAGGTA       |
| PF3D7_1477400 | PF14_0745             | <i>Plasmodium</i> exported protein (PHIST), unknown function             | TACCAGAACTCAAGCAAAGTTTTCA   | GGAAGGTAGATTATTTCCATAATGCA   |
| PF3D7_1477300 | PF14_0744             | Pfg14-744, <i>Plasmodium</i> exported protein (PHIST), unknown function  | ATTCTTACAGGCGCCAGAAC        | CCTGTTTATTCTCGCACGAA         |
| PF3D7_1477700 | PF14_0748             | Pfg14-748, <i>Plasmodium</i> exported protein (PHISTa), unknown function | ATTTTAGGAGTCTTATGTGCTGAATT  | CACTGCTCTAGGAACTACCC         |

|               |                          |                                                         |                          |                           |
|---------------|--------------------------|---------------------------------------------------------|--------------------------|---------------------------|
| PF3D7_0935400 | PFI1710w                 | GDV1, gametocyte development protein 1                  | CGCAACATGCTCAAAAGTAACC   | GGAGGCGGTTTGTGTTATTCA     |
| PF3D7_1253000 | PF12_0010,<br>PFL2550w   | GECO, gametocyte erythrocyte cytosolic protein          | TGTTGTGTGTAGTTGCTTTTGT   | TTGAACGATAACACACGTTTTCT   |
| PF3D7_1476600 | PF14_0736                | <i>Plasmodium</i> exported protein, unknown function    | ATGTCTCAACATGCGCTACA     | CGCTAGTATTGGGTGAAGCA      |
| PF3D7_1476500 | PF14_0735                | probable protein, unknown function                      | CGAGTCTTTTCTCGTCCTACC    | TCTGATTGGATCCTCCTGGAA     |
| PF3D7_1335000 | PF13_0196                | MSRP1, MSP7-like protein                                | GCAAGAAGGACAAACCGACAA    | CGCCTGTACCTCCTGATTCAA     |
| PF3D7_1346800 | PF13_0248                | P47, 6-cysteine protein                                 | CCCCTGACTAATGTTAAGCCAAC  | CCCAACGTAGGGTTGTTTATAGTAC |
| PF3D7_0406200 | MAL4P1.61,<br>PFD0310w   | Pfs16, sexual stage-specific protein precursor          | AAACGAAGAACGCAGATGATGATA | CTCCTTCGTCTCCTTCATCTGTA   |
| PF3D7_0422000 | MAL4P1.202,<br>PFD1035w  | steroid dehydrogenase, putative                         | GGATCAGTGAAAGATGCCATT    | GGAACATGGCACTGAACTTG      |
| PF3D7_0920000 | PFI0980w                 | ELO3, long chain fatty acid elongation enzyme, putative | CATGGAGCTTTACGGTGGAT     | TCGTGTGTGTATTTTTCTGTTTT   |
| PF3D7_1472900 | PF14_0697                | dihydroorotase, putative                                | CACTTAAGGCAAGGCGCAT      | CGTGTCGGCATCACTAAAA       |
| PF3D7_0927100 | PFI1330c                 | conserved <i>Plasmodium</i> protein, unknown function   | TGCTTGTAGACTTGTTGGCTCT   | TTTATGTTCCCGTTCGCTTT      |
| PF3D7_0215000 | PF02_0141,<br>PFB0685c   | ACS9, acyl-CoA synthetase                               | ACGTTTATAACAGGCGGAGGTA   | TCCAGTCGTTTCAGTTAATCCA    |
| PF3D7_1236200 | MAL12P1.348,<br>PFL1750c | conserved <i>Plasmodium</i> protein, unknown function   | AAATTTCCCGTTGATGTCCA     | AGTTCGTGATGTTGTCCA        |
| PF3D7_0525000 | MAL5P1.249,<br>PFE1245w  | zinc finger protein, putative                           | AATACAAACGCCACATCGAA     | CTTGCTTCATCCCTTGTT        |

|               |                                                         |                                                              |                          |                          |
|---------------|---------------------------------------------------------|--------------------------------------------------------------|--------------------------|--------------------------|
| PF3D7_1305200 | PF13_0026                                               | ApiAP2, AP2 domain transcription factor, putative            | TGGTTTAATACAAAACAGCAGGAA | CTAGCTGCTTCAAATTCGTTTT   |
| PF3D7_0604100 | MAL6P1.44, PFF0200c                                     | SIP2, SPE2-interacting protein                               | GGAATTTGAAATGCAGCAAAA    | TTCTCCATACCATCCCCTTT     |
| PF3D7_1143100 | PF11_0442                                               | AP2-O, AP2 domain transcription factor AP2-O, putative       | CCAACCTGATGAACAACCTG     | TTCCACCTTACCGCTATTCC     |
| PF3D7_1408200 | PF14_0079                                               | AP2-G2, AP2 domain transcription factor AP2-G2, putative     | TCGTGTTAGTTGGAAGGATCAA   | TCCTGCTTTAGTGGTCCATTTT   |
| PF3D7_1317200 | PF13_0097                                               | ApiAP2, AP2 domain transcription factor, putative            | TTGATAAATCTGGGAGGAGGTG   | TATTTAGCTTGTGCCTGACCAA   |
| PF3D7_0404100 | MAL4P1.40, PFD0200c                                     | AP2-SP2, AP2 domain transcription factor AP2-SP2, putative   | GCCAGCACGTTTGAACCTTA     | AGTTGTCCCCTTTTCAATGC     |
| PF3D7_0420300 | MAL4P1.192, PFD0985w                                    | ApiAP2, AP2 domain transcription factor, putative            | GATGGGATTCCACGAAAAGA     | ATTACTAGCGGGTGCTGACG     |
| PF3D7_0801900 | PF08_0133, MAL8P1.154                                   | conserved <i>Plasmodium</i> protein, unknown function        | TACCACCAACAGCGATACCA     | GAAGAAACGGATGGAGACCA     |
| PF3D7_0206300 | PF3D7_0206400, PF02_0059, PF02_0060, PFB0279W, PFB0280W | AROM, pentafunctional AROM polypeptide, putative, pseudogene | AGGACAGGAAACAGCATACG     | CACTAAGAACTTCCATCTTTTCCA |
| PF3D7_1466200 | PF14_0631                                               | conserved <i>Plasmodium</i> protein, unknown function        | TGTGGTGAATGCGGTTAATG     | TGCGTTATTCCTTCATTTGC     |
| PF3D7_0422300 | MAL4P1.205, PFD1050W                                    | alpha tubulin 2                                              | TGGTGGTGATGATGCCTTTA     | GTCAACGACGGTGGGTCTA      |
| PF3D7_0717700 | PF07_0073                                               | serine--tRNA ligase, putative                                | TGGAACAATGGTAGCTGCAC     | ATGTATGGGCGCAATTTTC      |

|               |                          |                                                       |                           |                          |
|---------------|--------------------------|-------------------------------------------------------|---------------------------|--------------------------|
| PF3D7_0202000 | PF02_0020,<br>PFB0100C   | KAHRP, knob-associated histidine-rich protein         | TTTTAGTATGGGTTTTGAAGTGCTC | TGTTGCTTTTGTGCTAAAGTTCTC |
| PF3D7_0930300 | PFI1475W                 | MSP1, merozoite surface protein 1                     | AACTGGCCTCGAAGCTGATA      | GGAACCATTTGCTGAATGTG     |
| PF3D7_1107800 | PF11_0091                | ApiAP2, AP2 domain transcription factor, putative     | GGAAATGTGGGTTCTACACCA     | CCCCAGAAGAGACTGCAGAA     |
| PF3D7_1363800 | MAL13P1.320              | GEX1, nuclear fusion protein, putative                | GATTAGCGCAAACATCCTTGT     | TTCGCTGAAATCGTTCTTGA     |
| PF3D7_1014200 | PF10_0139                | HAP2, male gamete fusion factor HAP2, putative        | ATGTCGTA CTGTCGTTTATGGAGA | CCTCAGACCTTAAAACCTTTAACC |
| PF3D7_1426500 | PF14_0244                | ABC2, ABC transporter G family member 2               | AAGTGGTGGTCAAAGAAAAAGATT  | AATCCACTTGTAGGTTTATCCATT |
| PF3D7_1222600 | MAL12P1.217,<br>PFL1085W | AP2-G, AP2 domain transcription factor AP2-G          | GATGGTGGGAAAATGGAAGA      | TAGCCATTCTCAATGCACCA     |
| PF3D7_1114000 | PF11_0148                | dynein light chain Tctex-type, putative               | TGTTGATGACGTGGAGCAAT      | CGTTCCAAAGAGACTTGGATG    |
| PF3D7_1413200 | PF14_0131                | conserved <i>Plasmodium</i> protein, unknown function | TGGATACGAGCAGCAGTTGT      | TGGTTGTTATGGAATGCTTGG    |
| PF3D7_0719200 | MAL7P1.100               | NEK4, NIMA related kinase 4                           | ACCCCTTTTCATTCAACCAA      | TGCTCTGTAACCTTGGTTCTCG   |
| PF3D7_0525900 | MAL5P1.258,<br>PFE1290W  | NEK2, NIMA related kinase 2                           | AAGCTTTTCGTTGAGGATTGTG    | TTCTCAGGGATGGGAGTTTC     |
| PF3D7_0518700 | MAL5P1.187,<br>PFE0935c  | PUF1                                                  | CAAACGAGGAGTACAAAACAAAAA  | GCAAAAATCCTACAACCCGTTT   |
| PF3D7_0417100 | MAL4P1.160,<br>PFD0825c  | PUF2                                                  | TCATCAAAAAGATTGTCAACGA    | TGCATCATAAAATTACCATAGCAG |
